# Supplementary material for: There is no difference in postoperative pain, function and complications in patients with chondrocalcinosis in the outcome of total knee arthroplasty for end-stage osteoarthritis
Source: Springer Nature journal article supplement (doi:10.1007/s00167-019-05725-7), 2019-09-24
Supplement: MOESM1 [file 17202820]

Vragenlijst Knie

(Eénzijdig)

Beste Mevrouw/mijnheer,

In het kader van onderzoek en bewaking van kwaliteit wordt u gevraagd antwoord te geven op de vragen in deze vragenlijst. Dit helpt ons om uw klachten beter te begrijpen en vergelijken. U zult gevraagd worden deze lijst in te vullen vóór uw knieoperatie en vervolgens 1, 2 en 5 jaar na uw operatie.

Het kan zijn dat sommige vragen erg op elkaar lijken. Dit komt omdat er verschillende internationale scores mee worden berekend die elk een eigen vraagstelling hebben. Vult u alstublieft zo goed mogelijk de vragenlijst in en vergeet niet uw naam en geboortedatum in te vullen op het eerste blad.

U kunt de vragenlijst terugsturen via de antwoordenvelop of bij uw volgende polikliniek bezoek afgeven aan de balie bij de poli orthopedie.

Hartelijk dank voor uw medewerking,

De orthopedisch chirurgen.

Naam ……………………..

Geboortedatum ……………………..

Datum van invullen ……………………..

Knieprothese rechts/links

(omcirkelen wat van toepassing is)

Pijn

1. Hoe zou u de pijn die u gewoonlijk in uw knie heeft omschrijven?

 Geen pijn

 Hele lichte pijn

 Milde pijn

 Matige pijn

 Ernstige pijn

1. Hoeveel pijn heeft u met lopen?

 niet pijnlijk

 alleen pijn na lopen van enige afstand

 pijn na starten van het lopen, niet toenemend

 pijn snel na starten van het lopen en toenemend na enige tijd lopen

1. Hoeveel pijn heeft u bij staan gedurende 30 minuten?

 niet of nauwelijks pijn

 wel pijnlijk

1. Hoeveel pijn heeft u als u wandelt?

 Geen

 Mild of af en toe

 Matig

 Ernstig

1. Hoeveel pijn heeft U tijdens traplopen?

 Geen

 Mild of af en toe

 Matig

 Ernstig

1. Hoeveel pijn heeft u in rust?

 Geen

 Mild of af en toe

 Matig

 Ernstig

1. Hoeveel pijn heeft u na lange tijd zitten (2 uur)?

 niet of nauwelijks pijn

 wel pijnlijk

1. Heeft u `s nachts wel eens pijn in de knie?

 niet of niet-significant

 alleen bij bewegen of in een bepaalde positie

 in rust

1. Hoe vaak heeft u 's nachts pijn in de knie?

 Geen enkele nacht

 1 of 2 nachten per week

 3 of 4 nachten per week

 5 of 6 nachten per week

 Alle nachten

1. Hoe pijnlijk is het om na het eten van tafel op te staan?

 Niet pijnlijk

 Licht pijnlijk

 Pijnlijk

 Zeer pijnlijk

 Ondraaglijk

1. Hoe lang duurt de ochtendstijfheid?

 1 minuut of minder

 meer dan 1 minuut maar minder dan 15 minuten

 15 minuten of meer

Functie

1. Hoe ver kunt U wandelen?

 onbeperkt

 >1000 meter

 500-1000 meter

 100-500 meter

 in huis

 niet mogelijk

1. Hoe lang kunt u lopen voordat de pijn in uw knie te hevig wordt?

 Geen pijn/meer dan 30 minuten

 16 tot 30 minuten

 5 tot 15 minuten

 Rondom het huis

 Niet mogelijk

1. Loopt u wel eens mank vanwege de knie?

 Zelden/nooit

 Af en toe of sinds kort voor het eerst

 Regelmatig

 Vrijwel altijd

 Altijd

1. Heeft u weleens het gevoel dat u door de knie heen zakt?

 Zelden/nooit

 Af en toe of sinds kort voor het eerst

 Regelmatig

 Vrijwel altijd

 Altijd

1. Kunt u door de hurken gaan en weer omhoog komen?

 Ja, gemakkelijk

 Met wat moeite

 Met moeite

 Met zeer veel moeite

 Nee, onmogelijk

1. Hoe ver kunt u lopen (mag met pijn lopen)?

 onbeperkt 0

 meer dan 1 km, maar beperkt 1

 ongeveer 1 km (in ongeveer 15 min.) 2

 tussen 500-900 m (in ongeveer 8-15 min.) 3

 tussen 300-500 m 4

 tussen 100-300 m 5

 minder dan 100 m 6

1. Hoe loopt u de trap?

 normaal op en af

 normaal op, af met reling

 met leuning op en af

 op met reling, af niet mogelijk

 niet mogelijk

1. Gebruikt u een hulpmiddel?

 Geen

 kruk of stok

 Twee krukken

 Looprek/walker

In hoeverre heeft u in het dagelijks leven problemen met…

1. ….sokken aantrekken door voorover te buigen

 zonder problemen

 met enige problemen

 met matige problemen

 met veel problemen

 niet in staat

1. ….een voorwerp oppakken van de vloer

 zonder problemen

 met enige problemen

 met matige problemen

 met veel problemen

 niet in staat

1. ….een normale trap op- en aflopen

 zonder problemen

 met enige problemen

 met matige problemen

 met veel problemen

 niet in staat

1. ….in en uit de auto kunnen stappen

 zonder problemen

 met enige problemen

 met matige problemen

 met veel problemen

 niet in staat

Kwaliteit van leven

1. Hoeveel invloed heeft de pijn in uw knie op de dagelijkse bezigheden?

 In het geheel niet

 Weinig

 Matig

 Veel

 Volledig

1. Kunt u zelf uw boodschappen doen?

 Ja, gemakkelijk

 Met wat moeite

 Met moeite

 Met zeer veel moeite

 Nee, onmogelijk

1. Heeft u vanwege uw knie moeite met uzelf te wassen en af te drogen?

 Geen moeite

 Weinig moeite

 Moeite

 Veel moeite

 Onmogelijk

1. Heeft u problemen om in/uit de auto te komen en/of problemen om met het openbaar vervoer te reizen vanwege uw knie?

 Geen problemen

 Weinig problemen

 Problemen

 Veel problemen

 Onmogelijk

1. Kunt u de trap aflopen?

 Ja, gemakkelijk

 Met wat moeite

 Met moeite

 Met zeer veel moeite

 Nee, onmogelijk

*In te vullen door de arts*

Naam ……………………..

Geboortedatum ……………………..

Datum van invullen ……………………..

Knieprothese rechts/links

(omcirkelen wat van toepassing is)

Wat is de totale bewegingsuitslag?

Flexie …………..

Extensie …………..

Hoe groot is de instabiliteit mediolateraal?

 0-5°

 5-10°

 >10°

Hoe groot is de anterioposteriore instabiliteit?

 0-5mm

 5-10mm

 >10mm

Hoe groot is de actieve extensiebeperking?

 geen

 <5°

 5-10°

 >11°

Hoe groot is de flexiecontractuur?

 <5°

 5-10°

 11°-20°

 >20°

Hoe is de valgus alignement?

 <10°

 10-15°

 15-20°

 20-25°
